1 **Extension of bacterial rDNA sequencing to concurrent epigenetic analysis and its**  
2 **application to 16S meta-epigenetics**

3

4 Motoi Nishimura<sup>a\*</sup>, Tomoaki Tanaka<sup>b</sup>, Syota Murata<sup>a</sup>, Akiko Miyabe<sup>a</sup>, Takayuki Ishige<sup>a</sup>, Kenji  
5 Kawasaki<sup>a</sup>, Masataka Yokoyama<sup>b</sup>, Satomi Tojo-Nishimura<sup>b</sup>, Kazuyuki Matsushita<sup>b</sup>

6

7 <sup>1</sup>Division of Laboratory Medicine, Clinical Genetics and Proteomics, Chiba University Hospital,  
8 Chiba, Japan

9 <sup>2</sup>Department of Molecular Diagnosis, Graduate School of Medicine, Chiba University, Chiba,  
10 Japan

11

12 Running Head: Extending rDNA sequencing to 16S meta-epigenetics

13

14 \* Address correspondence: Motoi Nishimura

15 Division of Laboratory Medicine, Clinical Genetics and Proteomics, Chiba University Hospital  
16 Chiba, Japan

17 Email: ZXA03460@nifty.ne.jp

18 **Abstract**

19 Although polymerase chain reaction (PCR) amplification and sequencing of the 16S rDNA  
20 region has been used in a wide range of scientific fields, it does not provide DNA methylation  
21 information. We describe a simple add-on method to investigate 5-methylcytosine residues in the  
22 bacterial 16S rDNA region from clinical samples or flora. Single-stranded bacterial DNA after  
23 bisulfite conversion was preferentially amplified with multiple displacement amplification  
24 (MDA) at pH neutral, and the 16S rDNA region was analyzed using nested bisulfite PCR and  
25 sequencing. 16S rDNA bisulfite sequencing can provide clinically important bacterial DNA  
26 methylation status concurrently with intact 16S rDNA sequence information. We used this  
27 approach to identify novel methylation sites and a methyltransferase (M. MmnI) in *Morganella*  
28 *morganii*. Next, we analyzed bacterial flora from clinical specimens of small amount and  
29 identified different methylation motifs among *Enterococcus faecalis* strains. The method  
30 developed here, referred to as "add-on" to the conventional 16S rDNA analysis, is the most  
31 clinically used bacterial identification genetic test, which provides additional information that  
32 could not be obtained with the conventional method. Since the relationship between drug  
33 resistance in bacteria and DNA methylation status has been reported, bacterial epigenetic  
34 information would be useful in clinical testing as well. Our analysis suggests that M. MmnI has a  
35 promotive effect on erythromycin resistance. 16S rDNA bisulfite PCR and sequencing coupled  
36 with MDA at pH neutral is a useful add-on tool for analyzing 16S meta-epigenetics.

37

38 **Keywords:** DNA methylation, DNA methyltransferase, bacterial epigenetics, microbiome, drug  
39 resistance, 16S rDNA

## 40 **Introduction**

41 Bacterial 16S rDNA (rRNA) gene sequencing has enabled the simple estimation of bacterial  
42 species by genetic testing and opened the door to microbiome analysis. Although bacterial 16S  
43 rDNA sequencing analyzes a relatively small region, it does not require bacterial culture and can  
44 estimate bacterial species with fairly high accuracy. Combined with short-read next-generation  
45 sequencing (NGS), 16S rDNA gene amplicon-based metagenomic analysis of bacterial  
46 communities is possible and relatively straightforward (1). At present, 16S rDNA sequencing has  
47 been widely incorporated in the field of science, including food analysis (2-4), environmental  
48 surveys (5, 6), and clinical tests (7-10).

49 Metagenomic analysis of bacterial DNA has been further developed in recent years and  
50 has been combined with epigenomic analysis (11), leading to the discovery of new methylation  
51 motifs and novel DNA methylases (12-14). However, this new meta-epigenomic technique is  
52 based on sequencing the whole genome and/or all nucleic acids in a sample. Thus, it loses the  
53 advantages of 16S rDNA analysis, which analyzes a narrow region of bacterial DNA but can  
54 identify a wide range of bacterial genera or species even from small-volume samples (15).

55 Here, we hypothesize that combining 16S rDNA sequencing with bisulfite polymerase  
56 chain reaction (PCR) (16) can add DNA methylation information to 16S rDNA analysis while  
57 retaining the existing benefits. Furthermore, since 16S rRNA is has several hairpin structures  
58 (17), and a palindrome sequence can form a hairpin structure, 16S rDNA may contain  
59 palindromic nucleotide sequences. Prokaryotic DNA methyltransferases recognize palindromic  
60 DNA sequences (18), hence 16S rDNA may be a region where DNA methylation is detected.  
61 Because the degree of methylation and the number of methylation sites on bacterial DNA differ  
62 greatly depending on the species (19), we designed primer sequences for the bisulfite PCR used

63 in this combination analysis, including a degenerated universal primer (Figure 1) targeting the  
64 16S rDNA region that detects 0% to 100% methylcytosine content at the primer site. This  
65 universal primer set can target both bisulfite-treated and non-bisulfite-treated bacterial genomic  
66 DNA (Figure 1), therefore bisulfite PCR and sequencing can provide information on the  
67 methylation status of the 16S rDNA sequence in parallel with the targeted 16S rDNA sequence  
68 itself.

## 69 **Materials and methods**

### 70 *Bacterial strains, clinical specimens, and DNA extraction*

71 *Escherichia coli* DNA adenine methyltransferase (dam)+/dcm+ (NEB 5-alpha competent *E. coli*,  
72 #C2987) and dam-/dcm- (dam-/dcm- competent *E. coli*, #C2925) strains were purchased from  
73 NEB (Ipswich, MA, USA) and cultured in Luria-Bertani (LB) medium. Clinical isolates, namely  
74 *K. oxytoca*, *M. morgani*, *P. mirabilis*, *P. aeruginosa*, *S. epidermidis*, *Serratia liquefaciens*, and  
75 *E. faecalis*, were cultured on plate agar for routine bacterial identification using MALDI-TOF  
76 mass spectrometry (Biotyper, Bruker Daltonics GmbH, Leipzig, Germany) at Chiba University  
77 Hospital (20). *Enterococcus faecalis* NBRC strains were purchased from the National Institute of  
78 Technology and Evaluation (Tokyo, Japan). Bacterial flora from patient urine samples was  
79 washed twice with phosphate-buffered saline and separated via centrifugation at  $3,000 \times g$  for 5  
80 min at a temperature of 20 °C to 25 °C. Each patient underwent routine clinical bacteriuria tests  
81 in which bacterial species were cultured on plate agar and identified using a Biotyper instrument.  
82 Bacterial DNA was extracted from either culture medium or separated bacterial flora using an  
83 innuPREP Bacteria DNA kit (Analytik Jena GmbH, Jena, Germany) according to the  
84 manufacturer's protocol.

85

86 ***Bisulfite PCR coupled with MDA at pH neutral***

87 Approximately half of the extracted bacterial DNA was subjected to bisulfite treatment using an  
88 innuCONVERT Bisulfite Basic kit (Analytik Jena). The remaining intact DNA was amplified  
89 with conventional MDA using a TruePrime WGA Kit (4basebio, Madrid, Spain). The bisulfite-  
90 converted DNA was amplified using MDA at neutral pH using the same kit. In MDA at pH  
91 neutral, bisulfite-converted single-stranded DNA was amplified untreated with alkaline by  
92 mixing the alkaline solution with an acidic solution prior to DNA input. In conventional MDA,  
93 intact double-stranded DNA was denatured with alkaline solution before the acid addition and  
94 amplification. MDA products from bisulfite-converted or unconverted bacterial DNA were  
95 subjected to nested PCR with the primer sets shown in Figure 1. The universal 16S rDNA  
96 bisulfite PCR primer sets were designed using the ApE (A plasmid Editor,  
97 <https://jorgensen.biology.utah.edu/wayned/appe/>) and Primer 3 ([http://bioinfo.ut.ee/primer3-](http://bioinfo.ut.ee/primer3-0.4.0/)  
98 0.4.0/) software under the following five conditions: i) targeting the V4–V5 region of 16S rDNA;  
99 ii) relatively few degenerate nucleotides (R (A, G) or Y (C, T)); iii) primer length > 20  
100 nucleotides; iv) prospects of priming more bacterial species, as expected from the results of  
101 BLAST targeting 16S rDNA sites; and v) an expected product size of 364 bp and 377 bp for *E.*  
102 *coli*, which is within the read length of the Ion PGM sequencer.

103 Bisulfite PCR was performed using the primer sets and nested PCR (Figure 1) utilizing  
104 KOD -Multi & Epi- DNA polymerase (TOYOBO, Tokyo, Japan) at a final concentration of 0.02  
105 U/ $\mu$ L. In nested PCR, the final primer concentrations were 0.6  $\mu$ M in both the first and second  
106 PCR steps. The cycling conditions were as follows: 94 °C for 2 min and 15 cycles (first reaction)  
107 or 20 cycles (second reaction) at 98 °C for 10 s,  $T_m$  °C for 30 s, and 68 °C for 15 s;  $T_m$  °C was  
108 56 °C for the positive strand in the first PCR step, 42 °C for the negative strand in the first PCR

109 step, and 52 °C for the second PCR step. Between the two reaction steps, excessive primers were  
110 removed with an enzymatic protocol using exonuclease I (NEB) and quick CIP (NEB).

111

### 112 ***Sanger and NGS***

113 Sanger sequencing was performed using a 3500xL Genetic Analyzer (Thermo Fisher Scientific,  
114 Waltham, MA, USA). A BigDye Terminator v3.1 Cycle Sequencing Kit (Thermo Fisher  
115 Scientific) was used for the cycle sequencing reaction. NGS was performed using an Ion Plus  
116 Fragment Library Kit, a Hi-Q View OT2 Kit, a Hi-Q View Sequencing Kit, or an Ion 318 Chip  
117 Kit v2 (Thermo Fisher Scientific) and a benchtop Ion PGM system according to the  
118 manufacturer's protocol. The DNA fragmentation step was skipped when using the Ion Plus  
119 Fragment Library Kit. The Sanger sequencing data and Ion Torrent BAM files were analyzed  
120 using CLC Genomics Workbench (Qiagen, CLC bio, Aarhus, Denmark), including running  
121 BLAST against the NCBI database (downloaded in May 2021).

122

### 123 ***Plasmid preparation***

124 To determine the DNA methyltransferase gene responsible for the consecutive methylation in the  
125 *M. morgani* 16S rDNA region (Figure 2B), we selected M.Mom25830ORF6305P and  
126 M.Mom25830ORF2065P (designated as M. Mmnl in this paper) as candidate genes by searching  
127 against a gold-standard dataset in the Restriction Enzyme Database (NEB REBASE) (21). The  
128 genes were cloned into the pCold III–Mor1 expression vector between the SacI (Takara Bio) and  
129 XbaI (Takara Bio) restriction sites. For the M.Mom25830ORF6305P-expressing plasmid, the  
130 gene-specific oligonucleotide primers used were 5'-GGTGAACGGTTCAGACGACT-3' and 5'-

131 CCTGCGCTACTGTTTCGGTA-3' in the first round of nested PCR and 5'-  
132 ATATGGAGCTCATGAAAAACACTGTTAATTT-3' and 5'-  
133 TACCTATCTAGATCACGTGAAACTTTCAAGACC-3' in the second round of PCR. For the  
134 M.Mom25830ORF2065P-expressing plasmid (designated pCold III-M. MmnI, Figure 3A), the  
135 gene-specific oligonucleotide primers used were 5'-TGTTTTTCCGGCCTTCCTGT-3' and 5'-  
136 CATCGGATTTTCAGCCGCTG-3' in the first round of nested PCR and 5'-  
137 CATATGGAGCTCATGATTTTGAAAAACACCC-3' and 5'-  
138 TACCTATCTAGATTATTTTACCGGCGGTATTG-3' in the second round of PCR. The entire  
139 cloned gene fragments in both plasmids were Sanger-sequenced.

140       The pCold III –Mor1 expression vector was constructed from pCold III vector (Takara  
141 Bio, Kyoto, Japan) at the NgoMIV (NEB) site by inserting the *M. morganii* 16S rDNA V4–V5  
142 region sequence with the following additional NgoMIV site: 5'-  
143 GCCGGCCAAGCGTTAATCGGAATTACTGGGCGTAAAGCGCACGCAGGCGGTTGATT  
144 GAGTCAGATGTGAAATCCCCGGGCTTAACCCGGGAATTGCATCTGATACTGGTCAGC  
145 TAGAGTCTTGTAGAGGGGGGTAGAATTCCATGTGTAGCGGTGAAATGCGTAGAGAT  
146 GTGGAGGAATACCGGTGGCGAAGGCGGCCCCCTGGACAAAGACTGACGCTCAGGTG  
147 CGAAAGCGTGGGGAGCAAACAGGATTAGATACCCTGGTAGTCCACGCTGTAAACGA  
148 TGTCGACTTGGAGGTTGTGCCCTTGAGGCGTGGCTTCCGGAGCTAACGCGTTAAGTC  
149 GACCGCCTGGGGAGTACGGCCGCAAGGTTAAACTCAAATGAATTGCCGGC-3'.

150

### 151 ***Experimental verification of DNA methyltransferase activity***

152 To verify the function of the M. MmnI gene, the plasmids were transformed into *E. coli* dam+/  
153 dcm+ (NEB 5-alpha competent *E. coli*, #C2987) and dam- / dcm- (dam-/dcm- competent *E. coli*,

154 #C2925) strains. The *E. coli* strains were cultured in LB broth (Thermo Fisher Scientific)  
155 supplemented with 100 mg/L ampicillin (FUJIFILM Wako Pure Chemical Corporation, Osaka,  
156 Japan). Plasmid DNA was isolated using the FastGene Xpress Plasmid PLUS Kit (Nippon  
157 Genetics, Tokyo, Japan). SacI was used to linearize the pCold III-M. MmnI plasmid DNA,  
158 which was then inactivated by heat at 70 °C. The methylation status was assayed via enzymatic  
159 digestion using DNA-methylation-sensitive SmaI (NEB) and -insensitive MspI (NEB) restriction  
160 enzymes (Figure 3B). Unmethylated pCold III-M. MmnI plasmid DNA was prepared by  
161 amplification using a Repli-g mini kit (Qiagen). We further verified the methylated motifs of M.  
162 MmnI. Briefly, half of the pCold III-M. MmnI plasmid DNA extracted from the transformed *E.*  
163 *coli* *dam*<sup>-</sup>/*dcm*<sup>-</sup> cells was subjected to bisulfite conversion. Both converted and unconverted  
164 DNA were subjected to restriction digestion followed by agarose gel electrophoresis (Figure 3B)  
165 and to Sanger sequencing as described above (Figure 3C).

166

### 167 ***Statistical analysis***

168 All statistical analyses, including calculation of standard deviations, were performed using Excel  
169 2016 (Microsoft, Redmond, WA, USA) with the add-in software Statcel 3 (OMS Publishing Inc.,  
170 Saitama, Japan).

171

### 172 ***Ethics***

173 The present study design, including the associated consent forms and procedures (according to  
174 the Ethics Guidelines for Medical Research for Humans in Japan), was approved by the Human  
175 Ethics Committee of Chiba University (No. 685). Urine samples were obtained from patients



176 who provided written informed consent, and the samples were then irreversibly anonymized  
177 according to the requirements of the ethics committee.

178

## 179 **Results**

180 There are difficulties in using bisulfite PCR on denatured DNA with bisulfite treatment and in  
181 sequencing the PCR products during 16S rDNA analysis. One reason for this is that the target  
182 DNA is denatured, becomes single-stranded by bisulfite treatment, and is damaged. Bisulfite  
183 treatment for methylcytosine-selective hydrolysis causes a significant level of target degradation  
184 (22). Even if the target DNA is not damaged, double-stranded DNA (dsDNA) is often more  
185 easily amplified than single-stranded DNA (ssDNA) (Supplementary Figure S1). Thus, in 16S  
186 rDNA bisulfite PCR, treated target ssDNA is at risk of being less amplified than non-denatured  
187 contaminated dsDNA. Further, the possibility of bacterial contamination from the lab  
188 environment cannot be completely ignored, especially because contaminating bacteria naturally  
189 has double-stranded 16S rDNA.

190 To reduce the contamination risk and repair degraded DNA and taking advantage of the  
191 fact that ssDNA can be preferentially amplified using neutral conditions via multiple  
192 displacement amplification (MDA at pH neutral, Supplementary Figure S1), which is usually  
193 performed using DNA treated in alkaline conditions, we performed bisulfite PCR of the 16S  
194 rDNA region.

195 Meta-epigenomics analysis assumes that when methylation analysis is randomly  
196 performed on DNA molecules in a sample, each sequence is not necessarily a sequence that can  
197 directly infer the species from which it originates. Even before meta-epigenomics, there are

198 examples of epigenomic studies of isolated and cultured bacteria (23,24). Whole genomic  
199 bisulfite-treated genomic DNA of the *E. coli* K-12 strain has been sequenced (23). A recently  
200 published epigenomics method using methylated-cytosine selective restriction enzymes (24),  
201 unlike previous meta-epigenomic analyses (11), does not require a single-molecule sequencer  
202 and does not change the large-scale analysis of non-targeted, random DNA molecules.

203 Because the sequence information of the 16S rDNA region is powerful for identifying  
204 bacterial species, this analysis has been widely adopted in clinical tests and biome analysis. If  
205 DNA methylation analysis can be performed completely in parallel with conventional 16S rDNA  
206 analysis, then DNA methylation information can be obtained by targeting regions that contain  
207 information that can more efficiently lead to the identification of bacterial species.

208 Here, we report that 16S rDNA bisulfite PCR coupled with MDA at pH neutral enables  
209 16S meta-epigenetic analysis by extending 16S rDNA sequencing to concurrent epigenetic  
210 analysis, which enables the discovery of novel methylation motifs and DNA methylases.

211 Although Chiba University Hospital is a medium-sized university hospital in Japan, its  
212 laboratory routinely performs more than 50,000 bacterial identification tests per year. In this  
213 study, clinical specimens prior to isolation and culture in bacterial identification tests and  
214 cultured isolates were used for 16S rDNA meta-epigenetic analysis. Specifically, the bacterial  
215 flora was isolated from urine samples by centrifugation. Next, bacterial DNA was extracted and  
216 used for microbiome analysis. Bacterial DNA was also extracted from cultured isolates. 16S  
217 rDNA methylation analysis was performed on all samples (Materials and methods).

218 The target region for bisulfite PCR coupled with MDA at pH neutral was the 16S rDNA  
219 V4-V5 region. This is because the V4 region is a target for popular 16S rDNA analysis kits  
220 [Illumina HiSeq sequencer (25)] but is also convenient for testing the ability to detect 5-

221 methylcytosine. For example, in *Escherichia coli*, the V4-V5 region contains five DNA cytosine  
222 methyltransferase (dcm) methylation sites (CC(A/T)GG), which were calculated from the NCBI  
223 NC\_000913 genomic sequence. This region was used because the target region size can be  
224 designed to fit into the read length of a short-read next-generation sequencer, such as a Thermo  
225 Fischer Scientific Ion PGM sequencer (Thermo Fisher Scientific, Waltham, MA, USA).

226 To increase the specificity of bisulfite PCR for this region, a universal primer set for  
227 nested PCR was designed for each of the positive-sense (+) and negative-sense (−) strands  
228 (Figure 1), thereby allowing effective 16S rDNA bisulfite PCR. Next, the bisulfite PCR products  
229 were analyzed using benchtop NGS (Ion PGM) or Sanger sequencing (Materials and methods).

230 To perform bisulfite PCR coupled with MDA at pH neutral, we extracted genomic DNA  
231 from dcm<sup>+</sup> and dcm<sup>−</sup> *E. coli* strains. Next, DNA was treated with bisulfite and amplified with  
232 MDA at pH neutral. Untreated DNA was amplified with normal MDA as a control. The MDA  
233 product was digested with the restriction enzymes MluCI (NEB, Ipswich, MA, USA) and  
234 Sau3AI (Takara Bio, Kyoto, Japan) to determine whether the bisulfite-treated DNA was  
235 amplified. The MluCI recognition site is AATT and the Sau3AI recognition site is GATC.  
236 Therefore, in the amplified product using DNA that has undergone bisulfite treatment, which  
237 converts unmethylated cytosine to uracil, many of the Sau3AI recognition sites will disappear,  
238 whereas the number of MluCI recognition sites will increase. As shown in Supplementary Figure  
239 S2A, the MDA product showed little change when digested with Sau3AI and was completely  
240 digested with MluCI, compared to the undigested condition. This result indicates that almost all  
241 amplified DNA was derived from bisulfite-converted DNA and that amplification from  
242 unconverted DNA was negligible.

243 The MDA products amplified using DNA extracted from a clinical isolate (*Klebsiella*  
244 *oxytoca*) and or using DNA extracted from a clinical microbiome sample (urine-derived bacteria)  
245 showed the same trend of being less digestible by Sau3AI and more digestible by MluCI  
246 (Supplementary Figure S2B, S2C), suggesting that the converted DNA was amplified similarly  
247 to the previously tested *E. coli* genomic DNA.

248 Next, 16S rDNA bisulfite PCR was performed on the amplified MDA products at pH  
249 neutral using a nested primer set (Figure 1) and the resulting products were sequenced. Of the 5  
250 dcm methylation sequences [CC(A/T)GG] in the *E. coli* 16S rDNA V4-V5 region (Figure 2A),  
251 the difference in methylation between dcm<sup>+</sup> and dcm<sup>-</sup> strains was detected at all dcm  
252 methylation sites. Thus, bisulfite sequencing coupled with MDA at pH neutral was able to detect  
253 cytosine methylated by dcm methylase in the target region.

254 Clinical isolates prepared for antibiotic sensitivity testing were then used as a template  
255 for MDA at pH neutral and for testing the downstream product (Supplementary Figure S2B).  
256 The MDA product was subjected to 16S rDNA bisulfite PCR and sequencing. In genomic DNA  
257 from *K. oxytoca*, methylation of CC(A/T)GG sites was detected (Supplementary Figure S3A),  
258 similar to sites in dcm<sup>+</sup> *E. coli*, as previously reported (26). Besides *K. oxytoca*, genomic DNA  
259 was extracted from clinical isolates of several species, including *Proteus mirabilis*, *Pseudomonas*  
260 *aeruginosa*, and *Staphylococcus epidermidis*, and was subjected to 16S rDNA bisulfite  
261 sequencing. Within the target region, methylcytosine was not detected in *P. mirabilis*  
262 (Supplementary Figure S3B). We observed partial methylation in *Pseudomonas aeruginosa* and  
263 *S. epidermidis* (Supplementary Figure S3C, D). For *Morganella morganii*, we observed  
264 methylation at the CC(A/T)GG sequence and four methylated residues at two consecutive SmaI  
265 sites that were encompassed by a palindrome-like structure (Figure 2B).

266 Clinical microbiome DNA was successfully amplified with MDA at pH neutral  
267 (Supplementary Figure S2C), and 16S rDNA bisulfite PCR and sequencing were performed on  
268 the MDA products. DNA extracted from the bacterial flora in urine samples was used as the  
269 clinical microbiome sample. These clinical samples were simultaneously subjected to isolation  
270 culture and routine bacterial identification tests. As in the clinical isolate experiment, the results  
271 of the 16S rDNA bisulfite sequencing were consistent with those of bacterial identification tests  
272 by isolation culture and matrix-assisted laser desorption/ionization-time of flight (MALDI-TOF)  
273 mass spectrometry (Supplementary Table S1). These results also indicated that there may be  
274 diversity in the methylation of the genomic DNA fragment that appears to be from *Enterococcus*  
275 *faecalis* in microbiome sample number 10\_1379 (Figure 2C).

276 Although constitutive genomic DNA methylation at the GCWGC and CCGG sites of an  
277 *E. faecalis* isolate was previously reported (27), methylation at the CC(A/T)GG site, as detected  
278 in this study, has not been reported. It is difficult to determine from the data shown in Figure 2C  
279 whether the diversity of methylation at the CC(A/T)GG site is due to mixing *E. faecalis* isolates  
280 with different genomic DNA methylation, because Figure 2C can be interpreted to reflect that  
281 methylation at the CC(A/T)GG site varies from cell to cell, even in the same strain. Additionally,  
282 it is possible that genomic DNA fragments from unknown or known different bacterial species  
283 with the same sequence as *E. faecalis* were mixed and analyzed in Figure 2C. Therefore, we  
284 conducted an experiment using clinical isolates and NBRC bank strains of *E. faecalis* to verify  
285 whether there is diversity in stable DNA methylation in *E. faecalis*. Indeed, the genomic DNA  
286 methylation at the CC(A/T)GG site in *E. faecalis* was different among isolates and strains  
287 (Supplementary Figure S4).

288           In *M. morganii*, four methylated residues at two consecutive SmaI sites within a  
289   palindrome-like structure were detected, suggesting the presence of an uncharacterized DNA  
290   cytosine-methyltransferase (Figure 2B). Since DNA methylation within such palindrome-like  
291   sequences has functional implications other than the restriction-modification system (28), we  
292   searched for the enzyme responsible for the consecutive methylation.

293   M.Mom25830ORF6305P and M.Mom25830ORF2065P, which are presumed to encode DNA  
294   methyltransferases in *M. morganii*, were identified using the REBASE database. Next, these  
295   genes were each cloned into pCold III expression plasmids along with the palindrome-like  
296   structure. These constructs were expressed in the *E. coli* dcm<sup>-</sup> strain using a previously  
297   described method ((11), Figure 3A). The results showed that in M.Mom25830ORF6305P,  
298   digestion of the extracted plasmid with SmaI was possible and methylation within the  
299   palindrome-like structure did not occur. In M.Mom25830ORF2065P, digestion with SmaI was  
300   blocked, indicating methylation of the palindrome-like structure (Figure 3B). Bisulfite  
301   sequencing of the palindrome-like structure confirmed the consecutive methylation (Figure 3C).  
302   The product of the M.Mom25830ORF2065P gene was designated as methyltransferase MmnI  
303   (M. MmnI).

304           Among the known bacterial DNA methylation sites in the SmaI site, SpyI methylase (M.  
305   SpyI) causes similar consecutive methylation with 5-methylcytosine (29). M. SpyI recognizes  
306   CCAGG, CCTGG, CCCGG, and CCGGG sequences, resulting in consecutive methylation at the  
307   SmaI site (29). Similarly, in the plasmid encoding M. MmnI, methylation was found at these four  
308   sequences, suggesting that M. MmnI recognizes these four sequences, and that there is partial  
309   homology between the amino acid sequences of M. MmnI and M. SpyI (Supplementary Figure

310 S5). Based on these results, we concluded that M. MmnI is the enzyme responsible for the four  
311 methylated residues at two consecutive SmaI sites within the palindrome-like structure.

312 Since M. SpyI is associated with erythromycin (EM) resistance (29), we investigated  
313 whether M. MmnI is also related to the responsiveness of *M. Morganii* to EM (30). The  
314 transformed *E. coli* dcm<sup>-</sup> strain containing the M. MmnI expression plasmid was estimated to  
315 have a slightly higher IC<sub>50</sub> (50 % growth-inhibitory concentration, approximately 70 mg/L) for  
316 EM than that of the *E. coli* dcm<sup>-</sup> strain with the plasmid lacking the M. MmnI open reading  
317 frame (approximately 32 mg/L) (Supplementary Figure S6).

318

## 319 **Discussion**

320 The 16S rDNA bisulfite PCR and sequencing method coupled with MDA at neutral pH  
321 presented in this paper allows the combination of DNA methylation analysis and 16S rDNA  
322 analysis via a universal bisulfite PCR primer set. Thus, analysis of various bacteria (Figure 2A,  
323 B, and Supplementary Figure S3) and bacterial flora can be performed using small-volume  
324 clinical samples. In contrast with meta-epigenomics (11), where all non-targeted nucleic acid  
325 sequences in a sample are analyzed randomly using a single-molecule sequencer, our method  
326 targets 16S rDNA analysis and can be described as “16S rDNA meta-epigenetics”. Although the  
327 former method provides comprehensive DNA sequence information, including methylcytosine  
328 and methyladenine, it requires large sample sizes, for example, 30 L of lake water (11). In  
329 contrast, our method can analyze only 2 mL of urine. Obtaining DNA methylation information in  
330 the 16S rDNA region is remarkably efficient in identifying the bacteria, from which the  
331 methylation originates. However, our method detects methylcytosine but not methyladenine.  
332 Since 16S rDNA meta-epigenetics can simultaneously infer species and identify DNA

333 methylation patterns, our results allow us to infer that *E. faecalis* has various methylation  
334 patterns depending on the strain or isolate (Figure 2C).

335         Sequencing of 16S rDNA has been practically incorporated into clinical testing. In  
336 clinical laboratories, 50,000 bacterial isolation, culture, and identification tests are conducted  
337 annually at our hospital alone, and countless specimens are discarded after testing worldwide.  
338 The method reported here can be added on to the conventional 16S rDNA identification test and  
339 enables DNA methylation analysis of various bacterial species in these discarded specimens. It is  
340 important to note that these bacteria were alive at the time of disposal, which means that if DNA  
341 methylation is detected using this method (Figure 2B), then living bacteria can be recovered and  
342 prepared for further analysis (Figure 3). As shown in Supplementary Figure S3C and D, a partial  
343 methylation pattern was detected in both gram-negative (*P. aeruginosa*) and gram-positive (*S.*  
344 *epidermidis*) bacteria. Partial methylation in bacterial genomes was reported in several epigenetic  
345 studies (23,31). These studies reported that partial DNA methylation may have some significance  
346 in relation to bacterial growth (23). Such cases are among the targets for future verification and  
347 further research.

348         In addition, we found that M MmnI from *M. morgani* methylates four consecutive SmaI  
349 sites in the palindrome-like sequence within the 16S rDNA region (Figures 2B and 3) and that  
350 M. MmnI may contribute to EM resistance. *M. morgani* is naturally resistant to EM (30). M.  
351 SpyI, a DNA methyltransferase with properties similar to M. MmnI, is associated with EM-  
352 resistant *S. pyogenes* strains. However, EM resistance has been primarily explained by other drug  
353 resistance genes genetically linked to M. SpyI (29). It was recently reported that knockout of  
354 dcm DNA methyltransferase, which recognizes CCAGG and CCTGG sequences, suppresses *E.*  
355 *coli* growth at lower EM concentrations (32). Therefore, DNA methyltransferases that recognize



356 CCAGG and CCTGG sequences may be modifying factors in EM resistance, if not the main  
357 factor. The relationship between bacterial responses to antibiotics and DNA methylation status  
358 (33) is an important subject for future analysis by 16S rDNA meta-epigenetics.

359         The 16S rDNA region is not large, but it is a prominent informative region that has been  
360 targeted for microbiome analysis. Our 16S rDNA bisulfite PCR and sequencing method will  
361 enable the simultaneous detection of (i) bacterial species and (ii) associated DNA methylation  
362 patterns directly from small amounts of bacterial flora specimens or specimens after isolation,  
363 culture, or drug resistance tests. Further, our method will facilitate the detection of unknown  
364 DNA methylation patterns and the identification of the responsible methyltransferases. In clinical  
365 laboratories, 16S rDNA bisulfite PCR and sequencing will contribute to the elucidation of the  
366 relationship between DNA methylation and clinically valuable information such as drug  
367 resistance.

368

### 369 **Acknowledgements**

370 We would like to thank Editage ([www.editage.com](http://www.editage.com)) for English language editing. This work was  
371 supported by JSPS KAKENHI Grant Numbers JP21H02823 and JP18K07408.

372

### 373 **Competing interest**

374 The authors declare no competing interest

375 **References**

- 376 1) Kuczynski J, Lauber CL, Walters WA, Parfrey LW, Clemente JC, Gevers D, Knight R.  
377 2012. Experimental and analytical tools for studying the human microbiome. *Nat Rev*  
378 *Genetics* 13:47–58.
- 379 2) Yang S, Shan CS, Xu YQ, Jin L, Chen ZG. 2021. Dissimilarity in sensory attributes, shelf  
380 life and spoilage bacterial and fungal microbiota of industrial-scale wet starch noodles  
381 induced by different preservatives and temperature. *Food Res Int* 140:109980.
- 382 3) Huang J, Guo Y, Hou Q, Huang M, Zhou X. 2020. Dynamic changes of the bacterial  
383 communities in roast chicken stored under normal and modified atmosphere packaging. *J*  
384 *Food Sci* 85:1231–1239.
- 385 4) Bindu A, Lakshmidhevi N. 2021. Identification and in vitro evaluation of probiotic  
386 attributes of lactic acid bacteria isolated from fermented food sources. *Arch Microbiol.*  
387 203:579–595.
- 388 5) Uyar E, Sağlam Ö. 2021. Isolation, screening and molecular characterization of  
389 biosurfactant producing bacteria from soil samples of auto repair shops. *Arch Microbiol.*  
390 DOI: 10.1007/s00203-021-02483-4.
- 391 6) Ye J, Qian H, Zhang J, Sun F, Zhuge Y, Zheng X. 2021. Combining culturing and 16S  
392 rDNA sequencing to reveal seasonal and room variations of household airborne bacteria  
393 and correlative environmental factors in Nanjing, Southeast China. *Indoor Air* 31:1095–  
394 1108.
- 395 7) Rueca M, Fontana A, Bartolini B, Piselli P, Mazzarelli A, Copetti M, Binda E, Perri F,  
396 Gruber CE, Nicastrì E, Marchioni L. 2021. Investigation of nasal/oropharyngeal microbial

- 397 community of COVID-19 patients by 16S rDNA sequencing. *Int J Environ Res Public*  
398 *Health* 18:2174.
- 399 8) Hong JS, Kim D, Kang DY, Park BY, Yang S, Yoon EJ, Lee H, Jeong SH. 2019.  
400 Evaluation of the BD phoenix M50 automated microbiology system for antimicrobial  
401 susceptibility testing with clinical isolates in Korea. *Microb Drug Resist* 25:1142–1148.
- 402 9) Loong SK, Khor CS, Jafar FL, AbuBakar S. 2016. Utility of 16S rDNA sequencing for  
403 identification of rare pathogenic bacteria. *J Clin Lab Anal* 30:1056–1060.
- 404 10) Yao T, Wang Z, Liang X, Liu C, Yu Z, Han X, Liu R, Liu Y, Liu C, Chen L. 2021.  
405 Signatures of vaginal microbiota by 16S rRNA gene: potential bio-geographical  
406 application in Chinese Han from three regions of China. *Int J Legal Med* 135:1213–1224.
- 407 11) Hiraoka S, Okazaki Y, Anda M, Toyoda A, Nakano SI, Iwasaki W. 2019. Metaepigenomic  
408 analysis reveals the unexplored diversity of DNA methylation in an environmental  
409 prokaryotic community. *Nat Commun* 10:159.
- 410 12) Tourancheau A, Mead EA, Zhang XS, Fang G. 2021. Discovering multiple types of DNA  
411 methylation from bacteria and microbiome using nanopore sequencing. *Nat Methods*  
412 18:491–498.
- 413 13) Fu J, Zhang J, Yang L, Ding N, Yue L, Zhang X, Lu D, Jia X, Li C, Guo C, Yin Z, Jiang  
414 X, Zhao Y, Chen F, Zhou D. 2021. Precision methylome and in vivo methylation kinetics  
415 characterization of *Klebsiella pneumoniae*. *Genomics Proteomics Bioinformatics*. DOI:  
416 10.1016/j.gpb.2021.04.002.
- 417 14) Leonard MT, Davis-Richardson AG, Ardisson AN, Kemppainen KM, Drew JC, Ilonen J,  
418 Knip M, Simell O, Toppari J, Veijola R, Hyöty H. 2014. The methylome of the gut

- 419 microbiome: disparate Dam methylation patterns in intestinal *Bacteroides dorei*. Front  
420 Microbiol 5:361.
- 421 15) Chen P, Bandoy DJD, Weimer BC. Bacterial epigenomics: Epigenetics in the age of  
422 population genomics. 2020. In Tettelin H, Medini D (eds), The pangenome: Diversity,  
423 dynamics and evolution of genomes. Springer, Cham.
- 424 16) Masser DR, Stanford DR, Freeman WM. 2015. Targeted DNA methylation analysis by  
425 next-generation sequencing. J Vis Exp 96:52488.
- 426 17) Noller HF, Woese CR. 1981. Secondary structure of 16S ribosomal RNA. Science  
427 212:403–411.
- 428 18) Zinoviev VV, Yakishchik SI, Evdokimov AA, Malygin EG, Hattman S. 2004. Symmetry  
429 elements in DNA structure important for recognition/methylation by DNA [amino]-  
430 methyltransferases. Nuc Acids Res 32:3930–3934.
- 431 19) Estibariz I, Overmann A, Ailloud F, Krebs J, Josenhans C, Suerbaum S. 2019. The core  
432 genome m5C methyltransferase JHP1050 (M. Hpy99III) plays an important role in  
433 orchestrating gene expression in *Helicobacter pylori*. Nuc Acids Res 47:2336–2348.
- 434 20) Segawa S, Nishimura M, Sogawa K, Tsuchida S, Murata S, Watanabe M, Matsushita K,  
435 Kamei K, Nomura F. 2015. Identification of *Nocardia* species using matrix-assisted laser  
436 desorption/ionization-time-of-flight mass spectrometry. Clin Proteomics 12:6.
- 437 21) Roberts RJ, Vincze T, Posfai J, Macelis D. 2010. REBASE—a database for DNA  
438 restriction and modification: enzymes, genes and genomes. Nucl Acids Res 38:D234–  
439 D236.

- 440 22) Tanaka K, Okamoto A. 2007. Degradation of DNA by bisulfite treatment. *Bioorg Med*  
441 *Chem Lett* 17:1912–1915.
- 442 23) Kahramanoglou C, Prieto AI, Khedkar S, Haase B, Gupta A, Benes V, Fraser GM,  
443 Luscombe NM, Seshasayee AS. 2012. Genomics of DNA cytosine methylation in  
444 *Escherichia coli* reveals its role in stationary phase transcription. *Nat Commun* 3:886.
- 445 24) Anton BP, Fomenkov A, Wu V, Roberts RJ. 2021. Genome-wide identification of 5-  
446 methylcytosine sites in bacterial genomes by high-throughput sequencing of MspJI  
447 restriction fragments. *PloS One* 16:e0247541.
- 448 25) Gohl DM, Vangay P, Garbe J, MacLean A, Hauge A, Becker A, Gould TJ, Clayton JB,  
449 Johnson TJ, Hunter R, Knights D, Beckman KB. 2016. Systematic improvement of  
450 amplicon marker gene methods for increased accuracy in microbiome studies. *Nat*  
451 *Biotechnol* 34:942–949
- 452 26) Gomez-Eichelmann MC, Levy-Mustri AL, Ramirez-Santos JE. 1991. Presence of 5-  
453 methylcytosine in CC (A/T) GG sequences (Dcm methylation) in DNAs from different  
454 bacteria. *J Bacteriol* 173:7692–7694.
- 455 27) Huo W, Adams HM, Zhang MQ, Palmer KL. 2015. Genome modification in *Enterococcus*  
456 *faecalis* OG1RF assessed by bisulfite sequencing and single-molecule real-time  
457 sequencing. *J Bacteriol* 197:1939–1951.
- 458 28) Furuta Y, Namba-Fukuyo H, Shibata TF, Nishiyama T, Shigenobu S, Suzuki Y, Sugano S,  
459 Hasebe M, Kobayashi I. 2014. Methylome diversification through changes in DNA  
460 methyltransferase sequence specificity. *PLoS Genetics* 10:e1004272.

- 461 29) Euler CW, Ryan PA, Martin JM, Fischetti VA. 2007. SpyI, a DNA methyltransferase  
462 encoded on a *mefA* chimeric element, modifies the genome of *Streptococcus pyogenes*. J  
463 Bacteriol 189:1044–1054.
- 464 30) Stock I, Wiedemann B. 1998. Identification and natural antibiotic susceptibility of  
465 *Morganella morganii*. Diagn Microbiol Infect Dis 30:153–165.
- 466 31) Korba BE, Hays JB. 1982. Partially deficient methylation of cytosine in DNA at CCATGG  
467 sites stimulates genetic recombination of bacteriophage lambda. Cell 28:531–541.
- 468 32) Chen Z, Wang H. 2021. Antibiotic toxicity profiles of *Escherichia coli* strains lacking  
469 DNA methyltransferases. ACS Omega 6:7834–7840.
- 470 33) Yuan W, Zhang Y, Riaz L, Yang Q, Du B, Wang R. 2021. Multiple antibiotic resistance  
471 and DNA methylation in Enterobacteriaceae isolates from different environments. J Hazard  
472 Mater 402:123822.

473 **Figure Captions**

474 **Figure 1. 16S rDNA bisulfite PCR and primer sets.** The bacterial 16S rDNA V4-V5 region  
475 was targeted using bisulfite PCR. Nested PCR primer sets were designed to amplify both intact  
476 and bisulfite-converted DNA. The primer sites were chosen to cover several bacterial species and  
477 reduce degenerate nucleotides. \*MDA at pH neutral was used for the amplification and repair of  
478 bisulfite-converted DNA. When amplifying unconverted DNA, the normal MDA method was  
479 used. MDA; multiple displacement amplification. R; A or G. Y; C or T. "m" means a  
480 methylcytosine base.

481

482 **Figure 2. Sequencing the 16S rDNA bisulfite PCR product from clinical isolates and**  
483 **microflora simultaneously provides rDNA sequence information and methylation status.**

484 Extracted DNA was treated with bisulfite and amplified with MDA at pH neutral. DNA without  
485 bisulfite treatment was amplified using normal MDA. Bisulfite PCR was performed using MDA  
486 products as templates, and the resulting PCR products were sequenced. A) Sanger sequencing of  
487 bisulfite PCR products from genomic DNA of dcm<sup>+</sup> and dcm<sup>-</sup> *E. coli*. The left side of the figure  
488 shows a typical CC(A/T)GG site targeted by dcm methylase and the right half shows another  
489 typical CC(A/T)GG site. The difference between dcm<sup>+</sup> and dcm<sup>-</sup> *E. coli* becomes apparent with  
490 bisulfite treatment, as shown by the black and green arrows. Green arrows indicate G to A  
491 conversion resulting from bisulfite conversion and unmethylated cytosine in the negative-sense  
492 strand. The black arrow (not converted) indicates the existence of 5-methylcytosine in the  
493 negative-sense strand. B) Summary of bisulfite sequencing from a clinical isolate of *Morganella*  
494 *morganii*. The red boxes indicate 5-methylcytosine in the negative-sense strand. The blue boxes  
495 indicate 5-methylcytosine in the positive-sense strand. Note that the four methylated residues at

496 the two SmaI sites (CCCGGG) are underlined in green. The four methylation residues exist in a  
497 palindrome-like structure, as indicated by the light blue arrows. The reference sequence was  
498 retrieved from NCBI NR\_028938.1. C) Implications of diversity in genomic DNA methylation  
499 status of *E. faecalis* from a microflora sample. 16S rDNA bisulfite-converted sequencing of  
500 MDA products indicated diverse DNA methylation at the CC(A/T)GG site (purple boxes) of the  
501 genomic DNA fragment that appears to be from *E. faecalis* in sample number 10\_1379  
502 (Supplementary Table S1). In the purple boxes, the letters G written in black in the bisulfite-  
503 converted sequences indicate 5-methylcytosine in the negative-sense strand. The reference  
504 sequences in the top two columns were retrieved from NCBI NC\_000913 (*E. coli*) and NCBI  
505 NR\_114782.1 (*E. faecalis*) and are the intact sequences, not bisulfite-converted sequences. The  
506 reference sequence in the third column from the top is the bisulfite-converted sequence (G>A),  
507 assuming that the reference *E. faecalis* sequence does not contain methylated cytosine.

508

509 **Figure 3. M. MmnI is responsible for four methylated residues at two consecutive SmaI**  
510 **sites within a palindrome-like structure.** A) Graphical scheme of pColdIII-M. MmnI (renamed  
511 from M.Mom25830ORF2065P) plasmid construction. B) Restriction digestion of the pColdIII-  
512 M. MmnI plasmid evaluated via agarose gel electrophoresis. MspI and SmaI were used, where  
513 the plasmid contained 37 CCGG and two CCCGGG target sites. Plasmid DNA was linearized  
514 using a unique SacI site. Thermo Fisher E-Gel 1 kb plus ladder was employed as a size marker.  
515 Control unmethylated DNA was prepared using a Repli-g kit (QIAGEN). C) Bisulfite  
516 sequencing of the palindrome-like structure confirmed the presence of four methylated residues  
517 in the two consecutive SmaI sites within the structure. The two SmaI sites are overlined in green.  
518 Black arrows indicate 5-methylcytosine in the negative-sense strand.



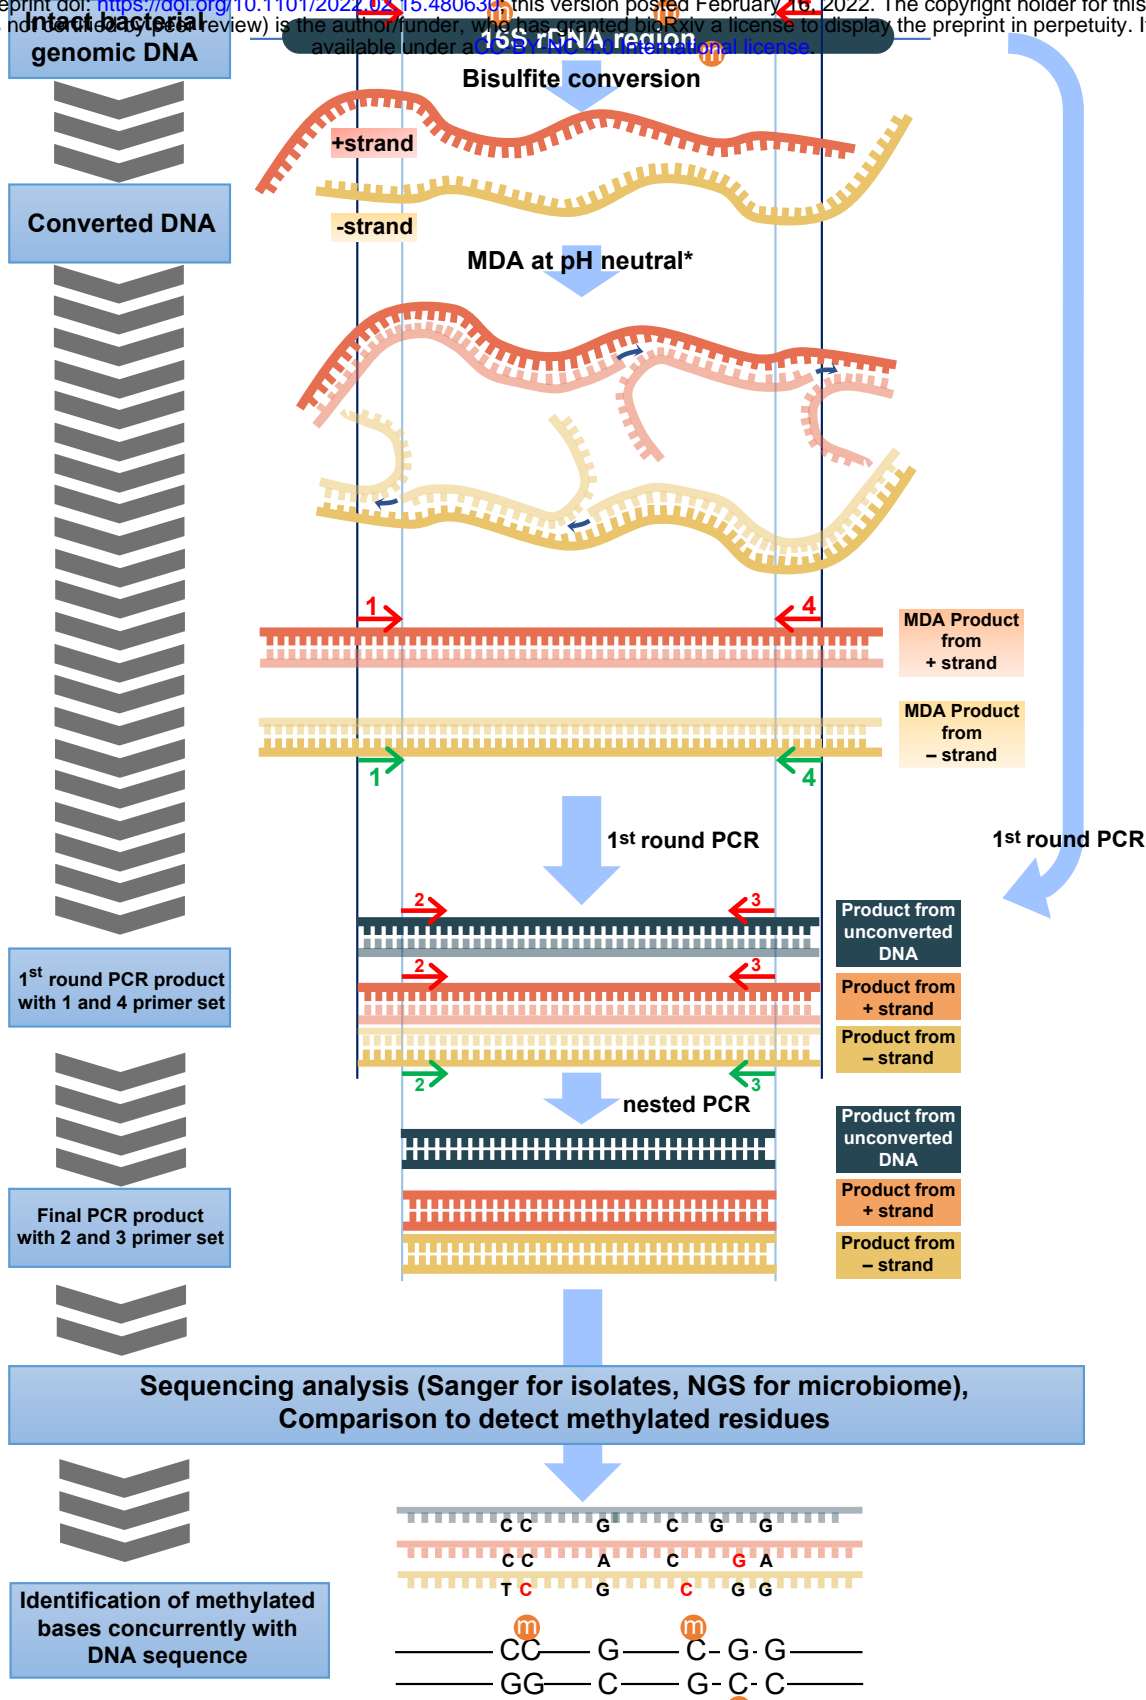

**Universal primer sets for 16S rDNA bisulfite PCR primer sets**

| <b>+strand primer sets</b> |               |                             |            |               |                             |
|----------------------------|---------------|-----------------------------|------------|---------------|-----------------------------|
| <b>1</b> →                 | Outer forward | AARCAACCCRRCTAACTCCRTRCCA   | ← <b>3</b> | Inner reverse | GTYAATTYATTTGAGTTTAA        |
| <b>2</b> →                 | Inner forward | CAARCRRTTAATCRRAATAACT      | ← <b>4</b> | Outer reverse | AATTYATTTGAGTTTAAAYTTGYGG   |
| <b>-strand primer sets</b> |               |                             |            |               |                             |
| <b>1</b> →                 | Outer forward | CCCCRCAATTCAATTTARTTTTAAACC | ← <b>3</b> | Inner reverse | GGTAATAYGGAGGGTGYAAGYGTAAAT |
| <b>2</b> →                 | Inner forward | TTTTAACCTTRCRRRCRTACTC      | ← <b>4</b> | Outer reverse | AAGYGTAAATYGAATTAYTGGG      |



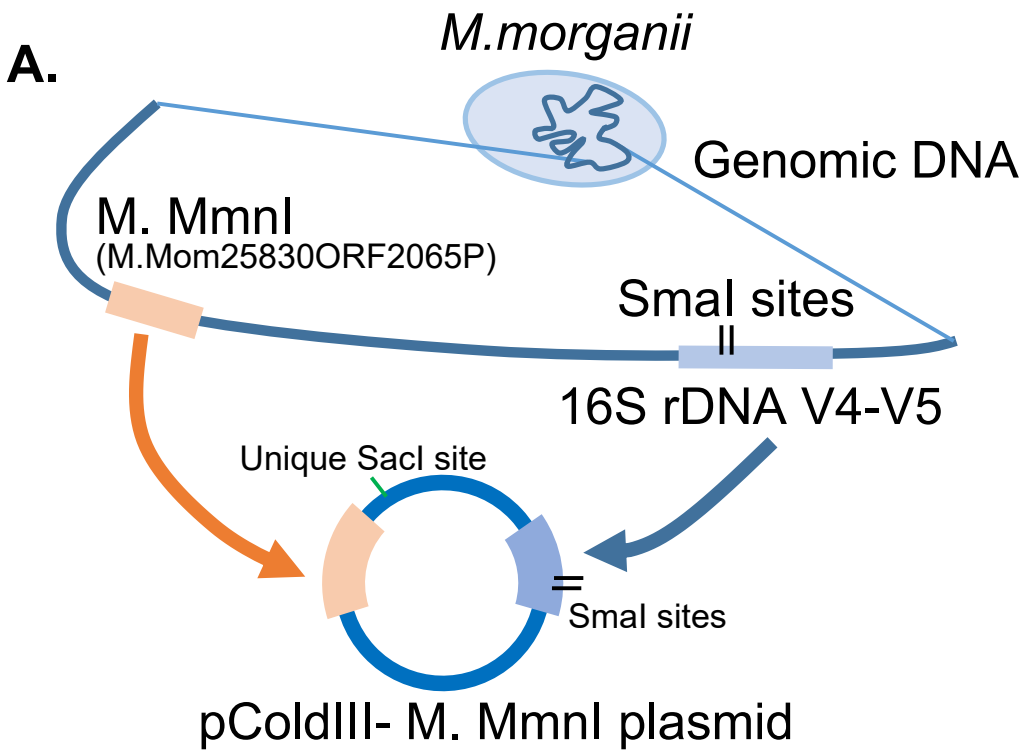

**B.** unmethylated Control      *M. Mmnl* expressing methylated plasmid

| unmethylated Control |           |           | <i>M. Mmnl</i> expressing methylated plasmid |      |           | Ladder |
|----------------------|-----------|-----------|----------------------------------------------|------|-----------|--------|
| SacI                 | SacI+MspI | SacI+SmaI | Undigested                                   | SacI | SacI+MspI |        |

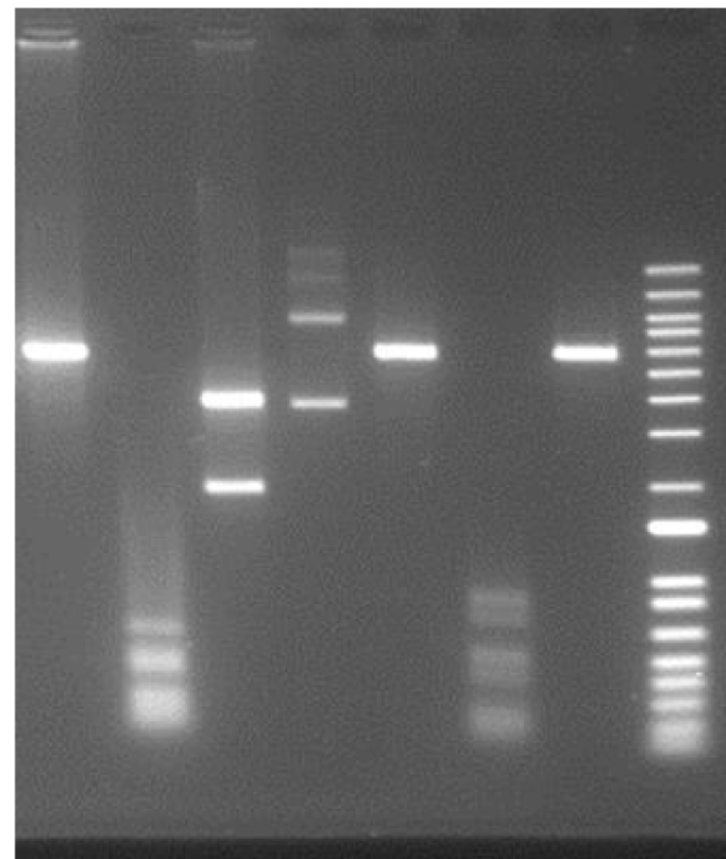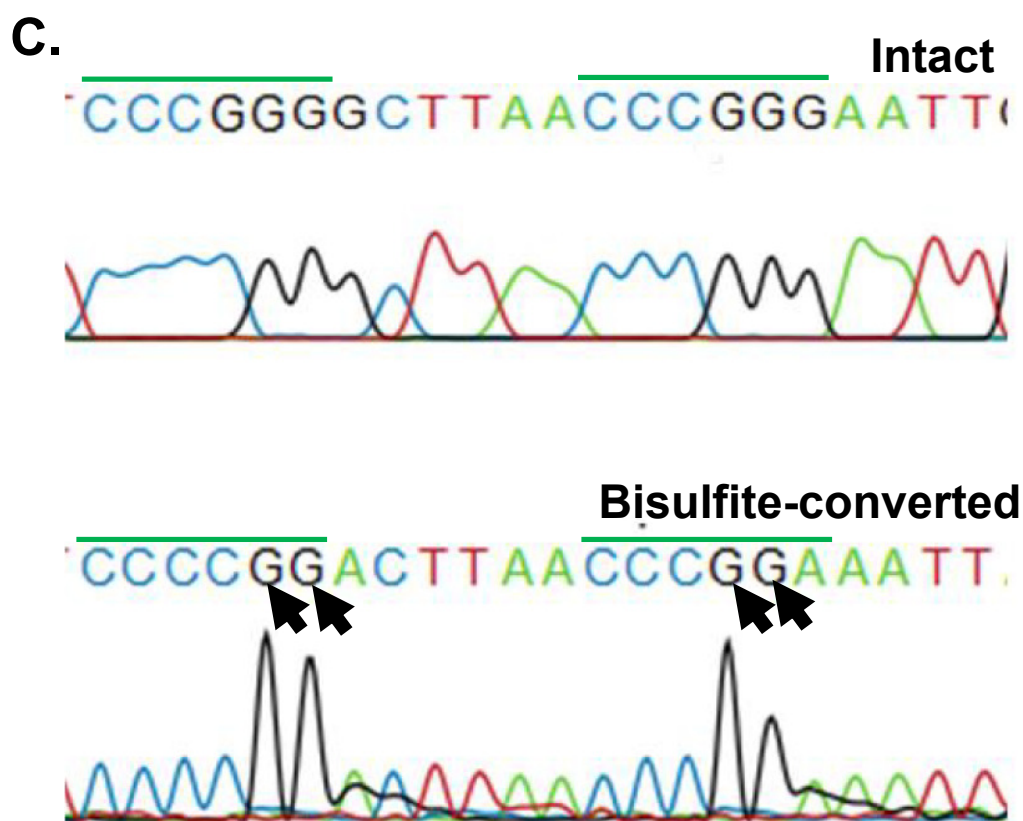

Source: https://www.biorxiv.org/content/10.1101/2022.02.15.480630v1.full.pdf
